# Supplementary material for: Circular RNA circRIMS1 Acts as a Sponge of miR-433-3p to Promote Bladder Cancer Progression by Regulating CCAR1 Expression
Source: PubMed Central journal article supplement — Mol Ther Nucleic Acids. 2020 Oct 10;22:815–31. doi: 10.1016/j.omtn.2020.10.003 (PMC7658378; doi:10.1016/j.omtn.2020.10.003), 2020-10-10
Supplement: mmc1.pdf [file mmc1.pdf]

OMTN, Volume 22

## **Supplemental Information**

### **Circular RNA circRIMS1 Acts as a Sponge of miR-433-3p to Promote Bladder Cancer Progression by Regulating CCAR1 Expression**

**Feifan Wang, Mengjing Fan, Yueshu Cai, Xuejian Zhou, Shengcheng Tai, Yanlan Yu, Hongshen Wu, Yan Zhang, Jiaxin Liu, Shihan Huang, Ning He, Zhenghui Hu, and Xiaodong Jin**

**Table S1. The sequences of primers and oligonucleotides used in this study**

| <b>Primers</b>                   |                                                             |
|----------------------------------|-------------------------------------------------------------|
| circ-RIMS1 F                     | TACACACTGGAGCATAATGA                                        |
| circ-RIMS1 R                     | AGAGTTATATTTTTCTTGTTCTGTT                                   |
| Linear RIMS1 F                   | AGTTGTGGTATGATAAAGTGGGACA                                   |
| Linear RIMS1 R                   | TTCGAGGACGTCCATCTACTCT                                      |
| GAPDH F                          | GTCAAGGCTGAGAACGGGAA                                        |
| GAPDH R                          | AAATGAGCCCCAGCCTTCTC                                        |
| Myc F                            | GGCCCCAAGGTAGTTATCC                                         |
| Myc R                            | GTTTCCGCAACAAGTCCTCTTC                                      |
| Birc5 F                          | GACCCACTTATTTCTGCCACATC                                     |
| Birc5 R                          | GAGTACAGAGGCTGGAGTGCATT                                     |
| CCAR1 F                          | CTGATGGCTAGCCCTAGTATGGA                                     |
| CCAR1 R                          | TGCCTTTCATGCCCACTAAAA                                       |
| CEP135 F                         | AGTTTGAGAGGGTTGTGGTGG                                       |
| CEP135 R                         | TGTATCCTTCTCGTGGGAGGT                                       |
| NEGR1 F                          | CCTCTTAACCCTCCAAGTACAGC                                     |
| NEGR1 R                          | CCAGCCATCAGCACTTTCAG                                        |
| Hsa-miR-433-3p                   | ATCATGATGGGCTCCTCGGTGT                                      |
| Hsa-miR-3064-5p                  | TCTGGCTGTTGTGGTGTGCAA                                       |
| Hsa-miR-301b-5p                  | GCTCTGACGAGGTTGCACTACT                                      |
| Hsa-miR-892b                     | CACTGGCTCCTTTCTGGGTAGA                                      |
| Hsa-miR-6803-5p                  | CTGGGGGTGGGGGGCTGGGCGT                                      |
| Hsa-miR-4268                     | GGCTCCTCCTCTCAGGATGTG                                       |
| Hsa-miR-6852-5p                  | CCCTGGGGTTCTGAGGACATG                                       |
| Hsa-miR-331-3p                   | GCCCCGGGCCTATCCTAGAA                                        |
| Hsa-miR-4316                     | GGTGAGGCTAGCTGGTG                                           |
| Hsa-miR-1468-5p                  | CTCCGTTTGCCTGTTTCGCTG                                       |
| miRNA reverse                    | All-in-One miRNA qRT-PCR detection kit,<br>GeneCopoeia, USA |
| <b>siRNAs Targeting sequence</b> |                                                             |
| Si circ-RIMS1 1#                 | CTTAGTCAAACAGAACAAGAA                                       |
| Si circ-RIMS1 2#                 | GTCAAACAGAACAAGAAAAAT                                       |
| Si circ-RIMS1 3#                 | TAGTCAAACAGAACAAGAAAA                                       |
| Si CCAR1 1#                      | CCATCACTCCTTGGAGCAT                                         |
| Si CCAR1 2#                      | CCACACAAACTCCAGCAA                                          |
| Si CCAR1 3#                      | CCAGCAAATCAGTTAA                                            |
| Si CEP135 1#                     | TGGGTGTATACCTATGTTAATGA                                     |
| Si CEP135 2#                     | TTGGAAAGACATAAAGAAGAAGT                                     |
| Si CEP135 3#                     | CAGCAGAAAGAGATAAACTAAGT                                     |
| Si NEGR1 1#                      | CTGTTTCATCTATGATAGTCAACT                                    |
| Si NEGR1 2#                      | TACAAGATTGTTGCAATTCAGA                                      |
| Si NEGR1 3#                      | ATCAAGTTAAACCATACACTATC                                     |

| <b>miRNAs mimics</b>                                     |                                  |
|----------------------------------------------------------|----------------------------------|
| Hsa-miR-433-3p sense                                     | AUCAUGAUGGGCUCCUCGGUGU           |
| Hsa-miR-433-3p anti-sense                                | UAGUACUACCCGAGGAGCCACA           |
| Hsa-miR-301b-5p sense                                    | GCUCUGACGAGGUUGCACUACU           |
| Hsa-miR-301b-5p anti-sense                               | CGAGACUGCUCCAACGUGAUGA           |
| Hsa-miR-1468-5p sense                                    | CUCCGUUUGCCUGUUUCGCUG            |
| Hsa-miR-1468-5p anti-sense                               | GAGGCAAACGGACAAAGCGAC            |
| <b>Biotinylated probes</b>                               |                                  |
| Biotin-circ-RIMS1                                        | GTTATATTTTTCTTGTCTGTTTGACTAAGCTG |
| <b>Probes for RNA Fluorescence in situ hybridization</b> |                                  |
| Hsa_circ_0132246-CY3                                     | TTTTCTTGTCTGTTTGACTA             |
| Hsa-miR-433-3p-FITC                                      | ACACCGAGGAGCCATCATGAT            |

**Table S2. Detailed information of our own 20 bladder cancer patients is listed**

| Patient number | Age at surgery | Gender | Grade | T   | N  | M  | AJCC clinical stage |
|----------------|----------------|--------|-------|-----|----|----|---------------------|
| 1              | 53             | Male   | High  | T4b | N2 | M0 | 4                   |
| 2              | 67             | Male   | High  | T4a | N1 | M0 | 4                   |
| 3              | 40             | Male   | High  | T2b | N3 | M0 | 4                   |
| 4              | 52             | Male   | Low   | Tis | N0 | M0 | Ois                 |
| 5              | 58             | Female | Low   | Tis | N0 | M0 | Ois                 |
| 6              | 59             | Female | High  | T1  | N0 | M0 | 1                   |
| 7              | 78             | Male   | Low   | Tis | N0 | M0 | Ois                 |
| 8              | 81             | Male   | High  | T1  | N0 | M0 | 1                   |
| 9              | 68             | Female | Low   | Tis | N0 | M0 | Ois                 |
| 10             | 66             | Male   | High  | T1  | N0 | M0 | 1                   |
| 11             | 68             | Male   | High  | T2a | N0 | M0 | 2                   |
| 12             | 73             | Male   | High  | T4b | N1 | M0 | 4                   |
| 13             | 61             | Female | Low   | Tis | N0 | M0 | Ois                 |
| 14             | 62             | Female | High  | T2  | N0 | M0 | 2                   |
| 15             | 68             | Male   | High  | T1  | N0 | M0 | 1                   |
| 16             | 84             | Female | High  | T2a | N0 | M0 | 2                   |
| 17             | 88             | Male   | High  | Tis | N0 | M0 | Ois                 |
| 18             | 86             | Male   | High  | T2  | N0 | M0 | 2                   |
| 19             | 84             | Male   | High  | T2  | N0 | M0 | 2                   |
| 20             | 48             | Male   | High  | T2b | N0 | M0 | 2                   |

**Table S3. Correlation of circRIMS1 expression with clinicopathologic features of our own bladder cancer patients**

| Characteristics                                | Number of cases | circRIMS1 expression in tumor tissue |      | P Value       |
|------------------------------------------------|-----------------|--------------------------------------|------|---------------|
|                                                |                 | Low                                  | High |               |
| Age (year)                                     |                 |                                      |      |               |
| <60                                            | 6               | 3                                    | 3    | > 0.9999      |
| ≥60                                            | 14              | 7                                    | 7    |               |
| Gender                                         |                 |                                      |      |               |
| Female                                         | 6               | 5                                    | 1    | 0.1409        |
| Male                                           | 14              | 5                                    | 9    |               |
| T stage                                        |                 |                                      |      |               |
| Tis-T <sub>1</sub>                             | 10              | 8                                    | 2    | <b>0.0230</b> |
| T <sub>2</sub> -T <sub>4</sub>                 | 10              | 2                                    | 8    |               |
| N stage                                        |                 |                                      |      |               |
| N0                                             | 16              | 10                                   | 6    | 0.0867        |
| N <sub>1</sub> +N <sub>2</sub> +N <sub>3</sub> | 4               | 0                                    | 4    |               |
| Grade                                          |                 |                                      |      |               |
| Low                                            | 5               | 5                                    | 0    | <b>0.0325</b> |
| High                                           | 15              | 5                                    | 10   |               |

The bold P value is less than 0.05, which has statistically significant.

**Table S4. Detailed information of 60 bladder cancer cases for CCAR1 IHC assay**

| Patient number | Age at surgery | Gender | Grade | T   | N  | M  | AJCC clinical stage |
|----------------|----------------|--------|-------|-----|----|----|---------------------|
| 1              | 76             | Male   | High  | T2  | N1 | M0 | 4                   |
| 2              | 67             | Male   | High  | Tis | N0 | M0 | Ois                 |
| 3              | 82             | Male   | High  | T3  | N0 | M0 | 3                   |
| 4              | 82             | Male   | High  | T2  | N0 | M0 | 2                   |
| 5              | 62             | Male   | High  | T2  | N0 | M0 | 2                   |
| 6              | 80             | Male   | High  | T2  | N0 | M0 | 2                   |
| 7              | 50             | Male   | High  | T3  | N0 | M0 | 3                   |
| 8              | 59             | Male   | High  | T3  | N0 | M0 | 3                   |

|    |    |        |      |     |    |    |     |
|----|----|--------|------|-----|----|----|-----|
| 9  | 66 | Male   | High | T2  | N0 | M0 | 2   |
| 10 | 76 | Male   | High | T3  | N0 | M0 | 3   |
| 11 | 67 | Male   | High | T2  | N0 | M0 | 2   |
| 12 | 83 | Male   | High | T1  | N0 | M0 | 1   |
| 13 | 81 | Male   | Low  | T2  | N0 | M0 | 2   |
| 14 | 75 | Male   | High | T3  | N1 | M0 | 4   |
| 15 | 71 | Male   | High | T4  | N1 | M0 | 4   |
| 16 | 75 | Male   | High | T3  | N0 | M0 | 3   |
| 17 | 72 | Female | High | T2  | N0 | M0 | 2   |
| 18 | 66 | Female | High | T2  | N0 | M0 | 2   |
| 19 | 67 | Male   | High | T2  | N1 | M0 | 4   |
| 20 | 58 | Male   | High | T1  | N0 | M0 | 1   |
| 21 | 77 | Male   | High | T1  | N0 | M0 | 1   |
| 22 | 68 | Male   | High | T3  | N0 | M0 | 3   |
| 23 | 61 | Male   | High | T1  | N0 | M0 | 1   |
| 24 | 58 | Female | High | T3  | N0 | M0 | 3   |
| 25 | 73 | Male   | High | T1  | N0 | M0 | 1   |
| 26 | 42 | Female | High | T3  | N0 | M0 | 3   |
| 27 | 57 | Male   | High | T2  | N0 | M0 | 2   |
| 28 | 55 | Male   | High | T3  | N0 | M0 | 3   |
| 29 | 75 | Male   | Low  | T1  | N0 | M0 | 1   |
| 30 | 73 | Male   | High | T3  | N0 | M0 | 3   |
| 31 | 77 | Male   | High | T3  | N1 | M0 | 4   |
| 32 | 57 | Male   | High | Tis | N0 | M0 | Ois |
| 33 | 78 | Male   | High | T1  | N0 | M0 | 1   |
| 34 | 74 | Male   | High | T1  | N0 | M0 | 1   |
| 35 | 72 | Female | Low  | Tis | N0 | M0 | Ois |
| 36 | 65 | Female | High | T3  | N0 | M0 | 3   |
| 37 | 59 | Male   | Low  | T4  | N0 | M0 | 3   |
| 38 | 75 | Male   | High | T3  | N0 | M0 | 3   |
| 39 | 55 | Male   | High | T3  | N0 | M0 | 3   |
| 40 | 57 | Male   | High | T3  | N0 | M0 | 3   |
| 41 | 61 | Male   | High | T3  | N1 | M0 | 4   |
| 42 | 79 | Male   | High | T3  | N0 | M0 | 3   |
| 43 | 77 | Male   | High | T1  | N0 | M0 | 1   |
| 44 | 48 | Male   | High | Tis | N0 | M0 | Ois |
| 45 | 72 | Female | Low  | Tis | N0 | M0 | Ois |
| 46 | 85 | Female | High | T3  | N0 | M0 | 3   |
| 47 | 76 | Male   | High | T1  | N0 | M0 | 1   |
| 48 | 61 | Male   | Low  | T1  | N0 | M0 | 1   |
| 49 | 75 | Male   | High | Tis | N0 | M0 | Ois |
| 50 | 66 | Female | Low  | Tis | N0 | M0 | Ois |
| 51 | 84 | Male   | High | T3  | N0 | M0 | 3   |

|    |    |        |      |     |    |    |     |
|----|----|--------|------|-----|----|----|-----|
| 52 | 75 | Male   | High | T2  | N1 | M0 | 4   |
| 53 | 78 | Male   | Low  | Tis | N0 | M0 | Ois |
| 54 | 44 | Male   | High | T3  | N0 | M0 | 3   |
| 55 | 77 | Female | High | T3  | N0 | M0 | 3   |
| 56 | 71 | Male   | High | T3  | N0 | M0 | 3   |
| 57 | 62 | Male   | High | T2  | N0 | M0 | 2   |
| 58 | 59 | Male   | Low  | T3  | N0 | M0 | 3   |
| 59 | 64 | Male   | Low  | T2  | N1 | M0 | 4   |
| 60 | 67 | Male   | High | T1  | N0 | M0 | 1   |

**Table S5. Correlation of CCAR1 expression with clinicopathologic features of 60 bladder cancer patients**

| Characteristics                | Number of cases | CCAR1 expression in tumor tissue |            | P Value       |
|--------------------------------|-----------------|----------------------------------|------------|---------------|
|                                |                 | Low score                        | High score |               |
| Age (year)                     |                 |                                  |            |               |
| <60                            | 14              | 5                                | 9          | 0.3604        |
| ≥60                            | 46              | 25                               | 21         |               |
| Gender                         |                 |                                  |            |               |
| Female                         | 10              | 6                                | 4          | 0.7306        |
| Male                           | 50              | 24                               | 26         |               |
| T stage                        |                 |                                  |            |               |
| Tis-T <sub>1</sub>             | 20              | 15                               | 5          | <b>0.0127</b> |
| T <sub>2</sub> -T <sub>4</sub> | 40              | 15                               | 25         |               |
| N stage                        |                 |                                  |            |               |
| N <sub>0</sub>                 | 52              | 27                               | 25         | 0.7065        |
| N <sub>1</sub>                 | 8               | 3                                | 5          |               |
| Grade                          |                 |                                  |            |               |
| Low                            | 10              | 8                                | 2          | 0.0797        |
| High                           | 50              | 22                               | 28         |               |

The bold P value is less than 0.05, which has statistically significant.

**Figure S1.** The efficiency of siRNAs for CCAR1, CEP135 and NEGR1 in T24 and EJ.

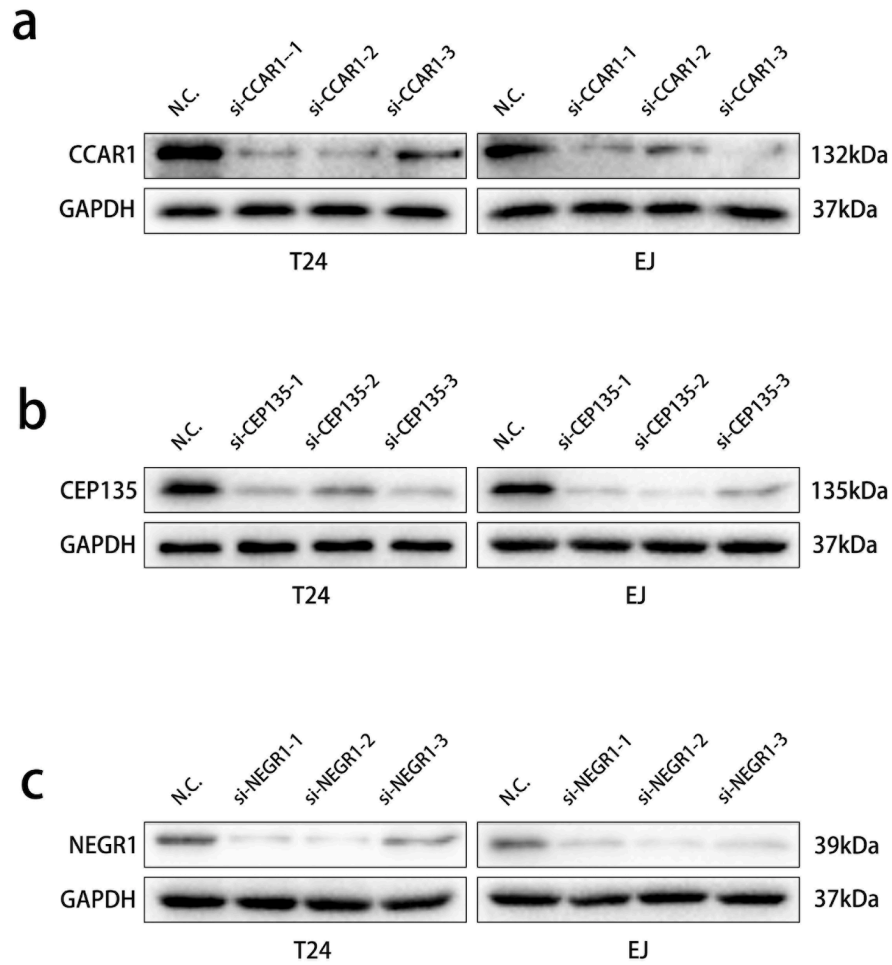

**Figure S1.** The efficiency of siRNAs for CCAR1, CEP135 and NEGR1 in T24 and EJ. **a-c** The alterations of CCAR1, CEP135 and NEGR1 in T24 and EJ cells stably transfected with N.C. or siRNAs were determined by western blotting respectively.

**Figure S2.** CCAR1 is regulated by miR-433-3p.

**a**

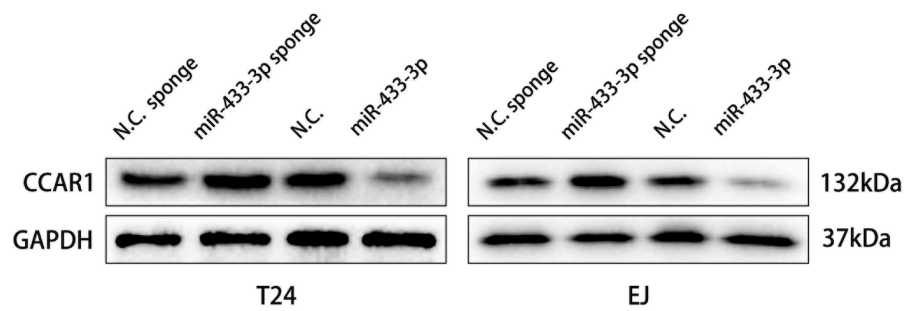

**b**

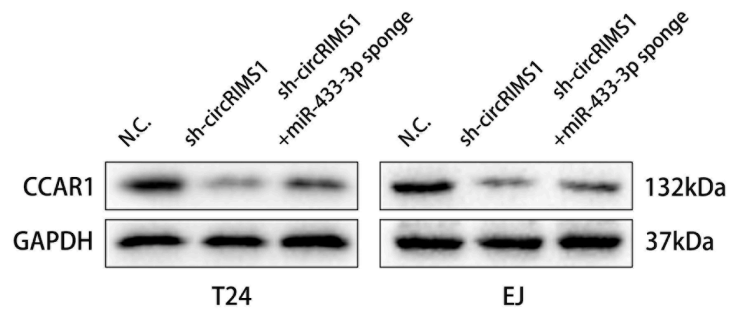

**Figure S2.** CCAR1 is regulated by miR-433-3p. **a.** The protein level of CCAR1 of bladder cancer cells transfected miR-433-3p sponge (or N.C. sponge) or pre-miR-433-3p (or N.C.) were respectively evaluated by western blotting. **b.** T24 and EJ cells were transfected with NC or sh-circRIMS1 or cotransfected with sh-circRIMS1 and miR-433-3p sponge. CCAR1 level was detected by western blotting.
